# Supplementary material for: Investigation of the viral and bacterial microbiota in intestinal samples from mink (Neovison vison) with pre-weaning diarrhea syndrome using next generation sequencing
Source: PubMed Central journal article supplement (PMC6193705; doi:10.1371/journal.pone.0205890), 2018-10-18
Supplement: pone.0205890.s002.pdf [file pone.0205890.s002.pdf]

| Pre-weaning diarrhea mink kit                                           |                                                                                                                      | Healthy mink kit                        |                                                                                                                                                                            |
|-------------------------------------------------------------------------|----------------------------------------------------------------------------------------------------------------------|-----------------------------------------|----------------------------------------------------------------------------------------------------------------------------------------------------------------------------|
| Feces score*                                                            | if score 3 OR<br>if score 4 OR<br>if score a                                                                         | Feces score*                            | if score 1 OR<br>if score 2                                                                                                                                                |
|                                                                         |                                                                                                                      | External assessment                     | AND<br>no red or swollen anus<br>AND<br>no dirty perineal region<br>AND<br>no cutaneous exudation on head, legs, trunk tail or paws                                        |
| If empty rectum or no feces to evaluate OR score 2 (cow-pat like feces) | if swollen or red anus OR<br>if dirty perineal region OR<br>if cutaneous exudation on head, leg, trunk, tail or paws | If empty rectum or no feces to evaluate | If no red or swollen anus<br>AND<br>no dirty perineal region<br>AND<br>no cutaneous exudation on the head, legs, trunk, tail, or paws<br><br>AND litter mates have score 1 |

\*Evaluated in rectum or from post mortem defecation

Unpublished data submitted to Acta Vet Scand.
